# Supplementary material for: Clinical and in vivo confocal microscopy characteristics of Candida keratitis following keratoplasty
Source: Springer Nature journal article supplement (doi:10.1186/s12886-023-03114-w), 2023-09-04
Supplement: MOESM1 [file 26002906]

## Consent for Publication of Identifying Material in BMC Ophthalmology

I give my permission for the following material to appear in the print, online, and licensed versions of BMC Ophthalmology Journal and for the Journal to grant permission to third parties to reproduce this material.

Title or subject of article or photograph, video, or audio: Clinical and in vivo confocal microscopy characteristics of *Candida* keratitis following keratoplasty

I understand that my name will not be published but that complete anonymity cannot be guaranteed.

I have read the manuscript or a general description of what the manuscript contains and reviewed all photographs, illustrations, video, or audio files (if included) in which I am included that will be published.

Liqing Wang

Signed

19 July 2023

Date

Liqing Wang

Print name

---

If you are granting permission for another person, what is your relationship to that person?

## Consent for Publication of Identifying Material in BMC Ophthalmology

I give my permission for the following material to appear in the print, online, and licensed versions of BMC Ophthalmology Journal and for the Journal to grant permission to third parties to reproduce this material.

Title or subject of article or photograph, video, or audio: Clinical and in vivo confocal microscopy characteristics of *Candida* keratitis following keratoplasty

I understand that my name will not be published but that complete anonymity cannot be guaranteed.

I have read the manuscript or a general description of what the manuscript contains and reviewed all photographs, illustrations, video, or audio files (if included) in which I am included that will be published.

Guixia Huang

Signed

19 July 2023

Date

Guixia Huang

Print name

---

If you are granting permission for another person, what is your relationship to that person?

Consent for Publication of Identifying Material in BMC Ophthalmology

I give my permission for the following material to appear in the print, online, and licensed versions of BMC Ophthalmology Journal and for the Journal to grant permission to third parties to reproduce this material.

Title or subject of article or photograph, video, or audio: Clinical and in vivo confocal microscopy characteristics of *Candida* keratitis following keratoplasty

I understand that my name will not be published but that complete anonymity cannot be guaranteed.

I have read the manuscript or a general description of what the manuscript contains and reviewed all photographs, illustrations, video, or audio files (if included) in which I am included that will be published.

Deli Zhong

Signed

20 July 2023

Date

Deli Zhong

Print name

\_\_\_\_\_

If you are granting permission for another person, what is your relationship to that person?

## Consent for Publication of Identifying Material in BMC Ophthalmology

I give my permission for the following material to appear in the print, online, and licensed versions of BMC Ophthalmology Journal and for the Journal to grant permission to third parties to reproduce this material.

Title or subject of article or photograph, video, or audio: Clinical and in vivo confocal microscopy characteristics of *Candida* keratitis following keratoplasty

I understand that my name will not be published but that complete anonymity cannot be guaranteed.

I have read the manuscript or a general description of what the manuscript contains and reviewed all photographs, illustrations, video, or audio files (if included) in which I am included that will be published.

Yuanyuan Zhou

20 July 2023

Signed

Date

Yuanyuan Zhou

Print name

---

If you are granting permission for another person, what is your relationship to that person?

## Consent for Publication of Identifying Material in BMC Ophthalmology

I give my permission for the following material to appear in the print, online, and licensed versions of BMC Ophthalmology Journal and for the Journal to grant permission to third parties to reproduce this material.

Title or subject of article or photograph, video, or audio: Clinical and in vivo confocal microscopy characteristics of *Candida* keratitis following keratoplasty

I understand that my name will not be published but that complete anonymity cannot be guaranteed.

I have read the manuscript or a general description of what the manuscript contains and reviewed all photographs, illustrations, video, or audio files (if included) in which I am included that will be published.

Daiqiang Liu

Signed

20 July 2023

Date

Daiqiang Liu

Print name

---

If you are granting permission for another person, what is your relationship to that person?

Consent for Publication of Identifying Material in BMC Ophthalmology

I give my permission for the following material to appear in the print, online, and licensed versions of BMC Ophthalmology Journal and for the Journal to grant permission to third parties to reproduce this material.

Title or subject of article or photograph, video, or audio: Clinical and in vivo confocal microscopy characteristics of *Candida* keratitis following keratoplasty

I understand that my name will not be published but that complete anonymity cannot be guaranteed.

I have read the manuscript or a general description of what the manuscript contains and reviewed all photographs, illustrations, video, or audio files (if included) in which I am included that will be published.

Xiuying Wang

Signed

19 July 2023

Date

Xiuying Wang

Print name

---

If you are granting permission for another person, what is your relationship to that person?
